# Supplementary material
Source: PubMed Central journal article supplement (PMC3258384)
Supplement: NIHMS338645-supplement-03.pdf [file NIHMS338645-supplement-03.pdf]

## Supporting Material

**Figure S1:** SDS-PAGE showing results of limited tryptic digest of  $\alpha$ CaN in the absence and presence of CaM. The  $\alpha$ CaN is protected from digestion by addition of CaM.

**Figure S2:** Deuterium uptake curves for RD-AID-CT peptides determined by HXMS. Different structured regions display distinct exchange kinetics. The horizontal dashed lines, where present, shows totally deuterated control exchange level,  $\wedge$  denotes peptides used in the heat map, \* indicates uptake curves constructed from incomplete data sets,  $\delta$  shows ambiguous (isobaric) peptide assignment (see Table S1). Error bars were determined from two independent data sets.

**Table S1:** Ambiguous (isobaric) RD-AID-CT peptide assignments as indicated in Figure S6.

| <b>Residue Numbers</b> | <b>Sequence</b>                                                                |
|------------------------|--------------------------------------------------------------------------------|
| 377-412                | LGSEEDGFDGATAAARKEVIRNKIRAIGKMARVFSV                                           |
| 378-413                | GSEEDGFDGATAAARKEVIRNKIRAIGKMARVFSVL                                           |
| 375-413                | DELGSEEDGFDGATAAARKEVIRNKIRAIGKMARVFSVL                                        |
| 379-416                | SEEDGFDGATAAARKEVIRNKIRAIGKMARVFSVLREE                                         |
| 380-417                | EEDGFDGATAAARKEVIRNKIRAIGKMARVFSVLREES                                         |
| 381-418                | EDGFDGATAAARKEVIRNKIRAIGKMARVFSVLREESE                                         |
| 418-449                | ESVLTLLKGLTPTGMLPSGVLSGGKQTLQSATV                                              |
| 419-450                | SVLTLLKGLTPTGMLPSGVLSGGKQTLQSATVE                                              |
| 421-431                | LTLKGLTPTGM                                                                    |
| 422-432                | TLKGLTPTGML                                                                    |
| 421-495                | LTLKGLTPTGMLPSGVLSGGKQTLQSATVEAIEADEAIKGFSPQHKITSF<br>EEAKGLDRINERMPPRRDAMPDAN |
| 422-496                | TLKGLTPTGMLPSGVLSGGKQTLQSATVEAIEADEAIKGFSPQHKITSFE<br>EAKGLDRINERMPPRRDAMPDANL |
| 421-443                | LTLKGLTPTGMLPSGVLSGGKQT                                                        |
| 422-444                | TLKGLTPTGMLPSGVLSGGKQTL                                                        |
| 422-447                | TLKGLTPTGMLPSGVLSGGKQTLQSA                                                     |
| 423-448                | LKGLTPTGMLPSGVLSGGKQTLQSAT                                                     |

| <b>Residue Numbers</b> | <b>Sequence</b>   |
|------------------------|-------------------|
| 450-455                | EAIEAD            |
| 451-456                | AIEADE            |
| 452-457                | IEADEA            |
| 453-458                | EADEAI            |
| 454-470                | ADEAIKGFSPQHKITSF |
| 460-476                | GFSPQHKITSFEEAKGL |
| 456-470                | EAIKGFSPQHKITSF   |
| 457-471                | AIKGFSPQHKITSFE   |
| 456-471                | EAIKGFSPQHKITSFE  |
| 457-472                | AIKGFSPQHKITSFEE  |
| 458-473                | IKGFSPQHKITSFEEA  |
| 461-476                | FSPQHKITSFEEAKGL  |
