# Supplementary material
Source: PubMed Central journal article supplement (PMC3258384)

Deuterium Uptake (Da)

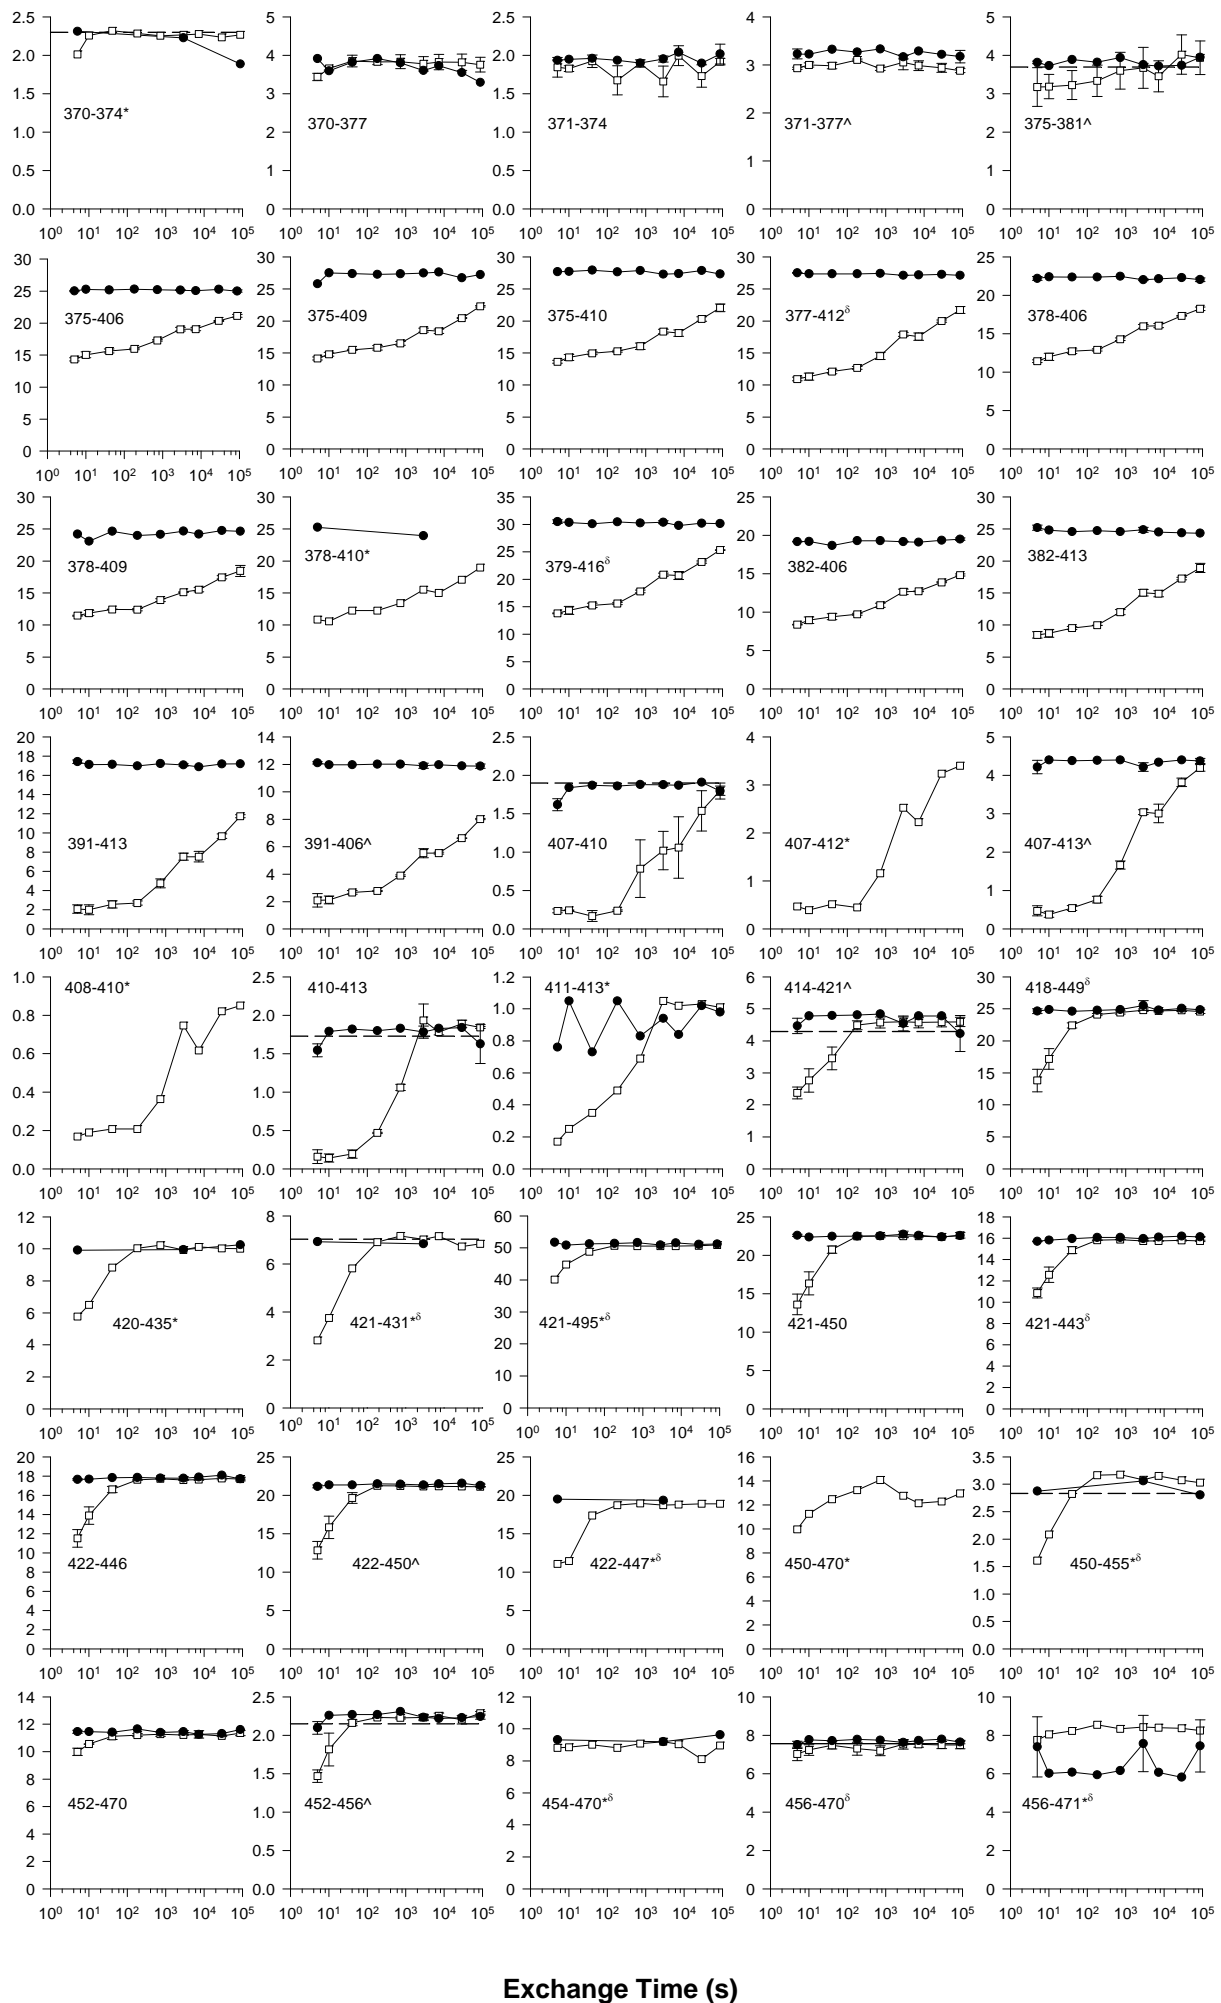

Exchange Time (s)

Deuterium Uptake (Da)

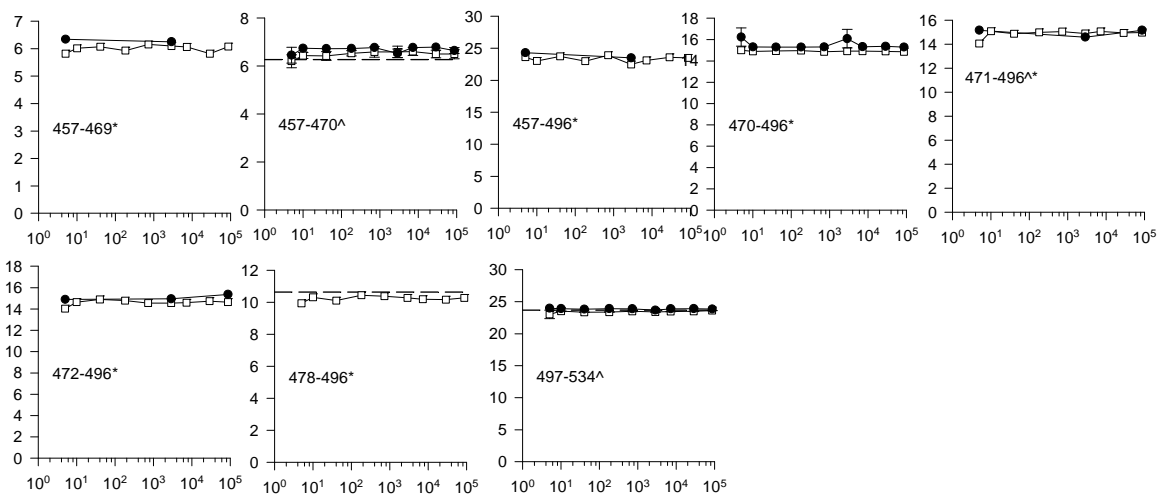

Exchange Time (s)

Supplement: NIHMS338645-supplement-02.pdf [file NIHMS338645-supplement-02.pdf]
